# Supplementary material for: Synthesis of indole-based functional polymers with well-defined structures via a catalyst-free C–N coupling reaction
Source: Royal Society of Chemistry journal article supplement (doi:10.1039/c4ra03602f), 2014-01-01

## *Supporting Information*

### **Synthesis of Indole-Based Functional Polymers with Well-Defined Structures via Catalyst-free C-N Coupling Reaction**

*Guanjun Chang*<sup>\*,1</sup>, *Li Yang*<sup>1</sup>, *Shenye Liu*<sup>2</sup>, *Xuan Luo*<sup>2</sup>, *Runxiong Lin*<sup>3</sup>, *Lin Zhang*<sup>2</sup>

<sup>1</sup> State Key Laboratory Cultivation Base for Nonmetal Composite and Functional Materials & School of Material Science and Engineering, Southwest University of Science and Technology, Mianyang, 621010, China.

<sup>2</sup> Joint Laboratory for Extreme Conditions Matter Properties, Southwest University of Science and Technology and Research Center of Laser Fusion, China Academy of Engineering Physics, Mianyang, 621900, China.

<sup>3</sup> Engineering Research Center of High Performance Polymer and Molding Technology, Ministry of Education, Qingdao University of Science and Technology, Qingdao, 266042, China.

*Tel:* +86-13990158034; *E-mail:* gjchang@mail.ustc.edu.cn

## Table of contents

|                                                                                                                                         |     |
|-----------------------------------------------------------------------------------------------------------------------------------------|-----|
| I. Synthesis of 3,3'-diindolylmethane.....                                                                                              | S3  |
| II. Optical properties of model compounds.....                                                                                          | S4  |
| III. IR spectra of model compounds (3-5), <b>PMDINs</b> and cross-linked <b>PMDIN-3</b><br>film.....                                    | S5  |
| IV. The SEM of the dip coated <b>PMDIN-3</b> film.....                                                                                  | S9  |
| V. Copies of <sup>1</sup> H and <sup>13</sup> C NMR spectra of 3,3'-diindolylmethane, model compounds (3-5),<br>and <b>PMDINs</b> ..... | S10 |

## I. Synthesis of 3,3'-diindolylmethane <sup>[1]</sup>

To a mixture of indole (10 mmol) and formaldehyde (5 mmol) was added the bentonitic clay (5 g). The reaction mixture was IR irradiated with a commercial IR lamp (250 W), according to the methodology reported by Pool and Teuben, <sup>[2]</sup> for 15 minutes (after this reaction time no changes were detected by thin layer chromatography), and the temperature reached during the reaction was 180 °C. Then, to the produced reaction mixture a 1 : 1 water–methanol mixture was added for recrystallization purpose.

<sup>1</sup>H-NMR (600 MHz, DMSO-*d*<sub>6</sub>): δ = 4.14 (s, 2H), 6.90 (t, *J* = 10.2 Hz, 12.0 Hz, 2H), 7.02 (t, *J* = 10.8 Hz, 12.0 Hz, 2H), 7.13 (d, *J* = 2.4 Hz, 2H), 7.31 (d, *J* = 12.0 Hz, 2H), 7.52 (d, *J* = 12.0 Hz, 2H), 10.73 (s, 2H) ppm; <sup>13</sup>C-NMR (150 MHz, DMSO-*d*<sub>6</sub>): δ = 20.9, 111.3, 114.2, 118.0, 118.6, 120.7, 122.7, 127.2, 136.4 ppm; MS (ESI) *m/z*: 246 [M]<sup>+</sup>; Anal. Calcd for C<sub>17</sub>H<sub>14</sub>N<sub>2</sub>: C, 82.90; H, 5.73; N, 11.37; Found: C, 81.75, H, 5.77, N, 11.04.

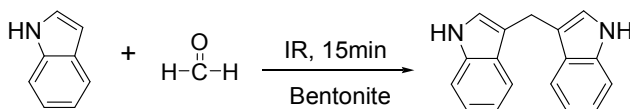

**Scheme S1.** Synthesis of 3,3'-diindolylmethane

[1] G. Penieres-Carrillo, J. G. García-Estrada, J. L. Gutiérrez-Ramírez and C. Alvarez-Toledano. *Green Chemistry*, 2003, 5, 337.

[2] G. Pool and J. Teuben, *ACS Symp. Ser.*, 1987, 357, 30.

## II. Optical properties of model compounds

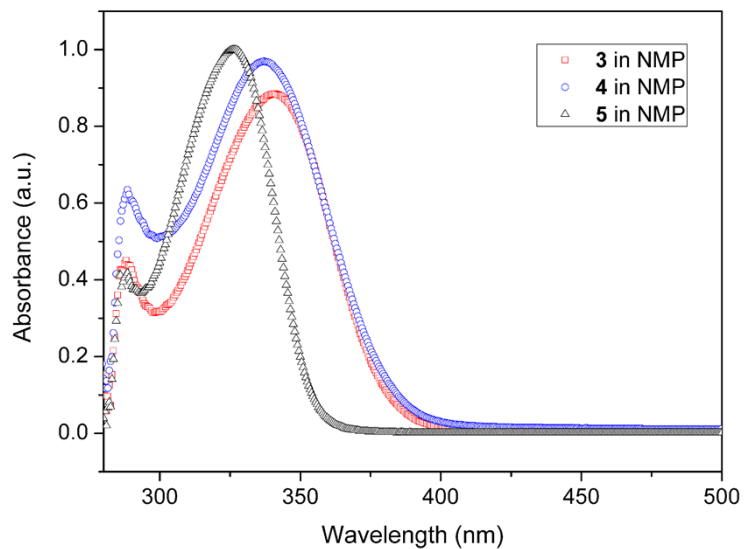

**Figure S1.** UV spectra of model compounds **3-5** in NMP solutions. Solution concentration:  $10^{-5}$  M.

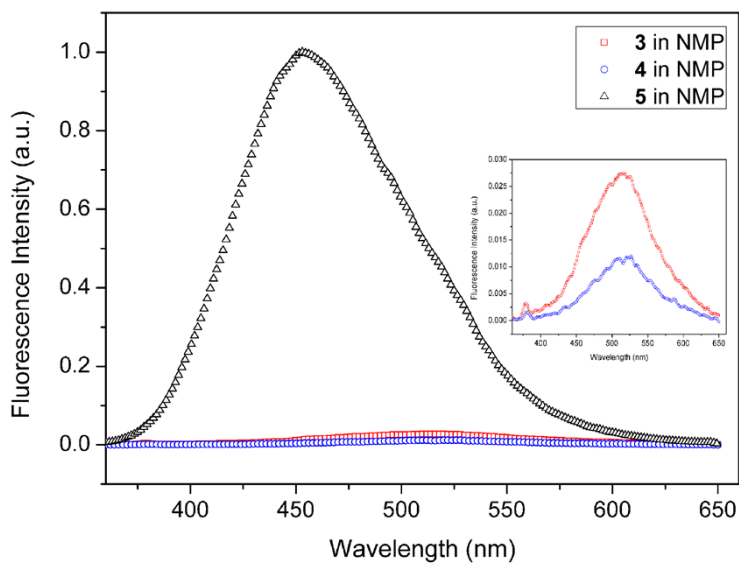

**Figure S2.** Fluorescence spectra of **3**, **4** and **5** in NMP ( $\lambda_{\text{exc}} = 340$  nm,  $340$  nm,  $320$  nm, respectively; excitation and emission slits =  $5.0$  nm and  $2.5$  nm, respectively).

### III. IR spectra of model compounds (3-5) and PMDINs

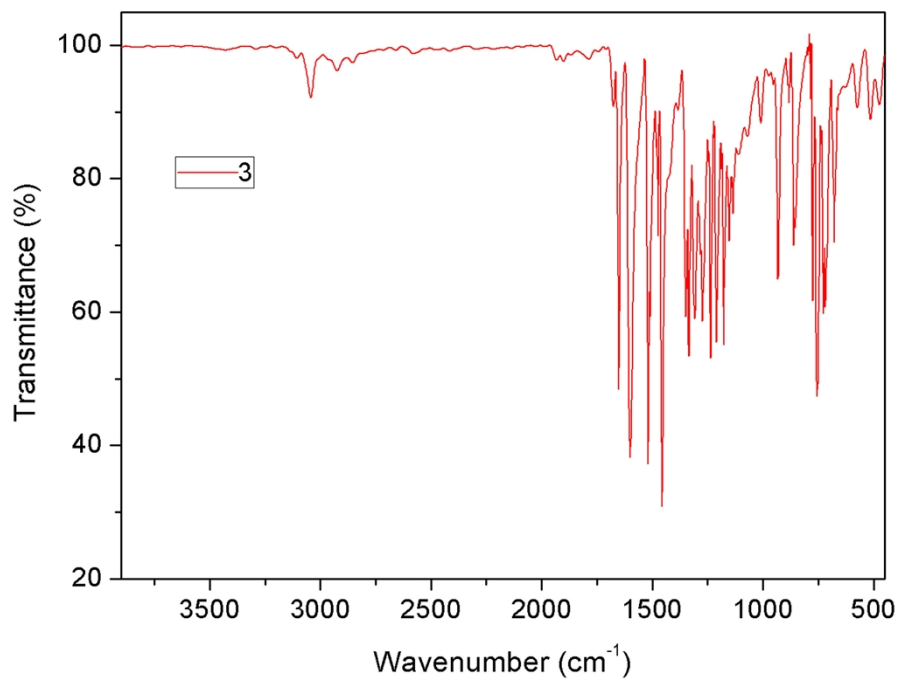

**Figure S3.** The IR spectrum of model compound 3.

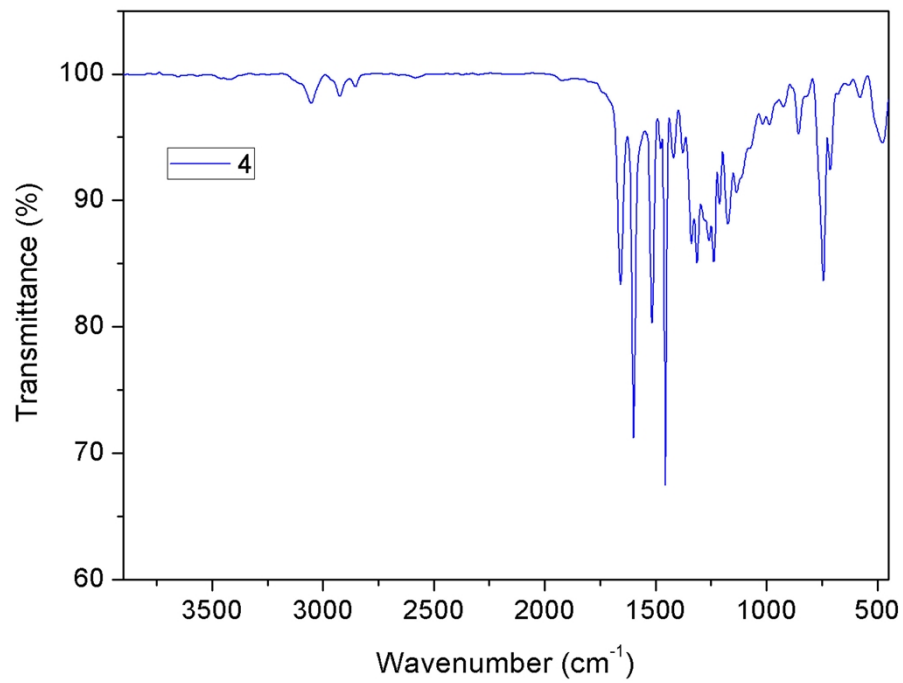

**Figure S4.** The IR spectrum of model compound 4.

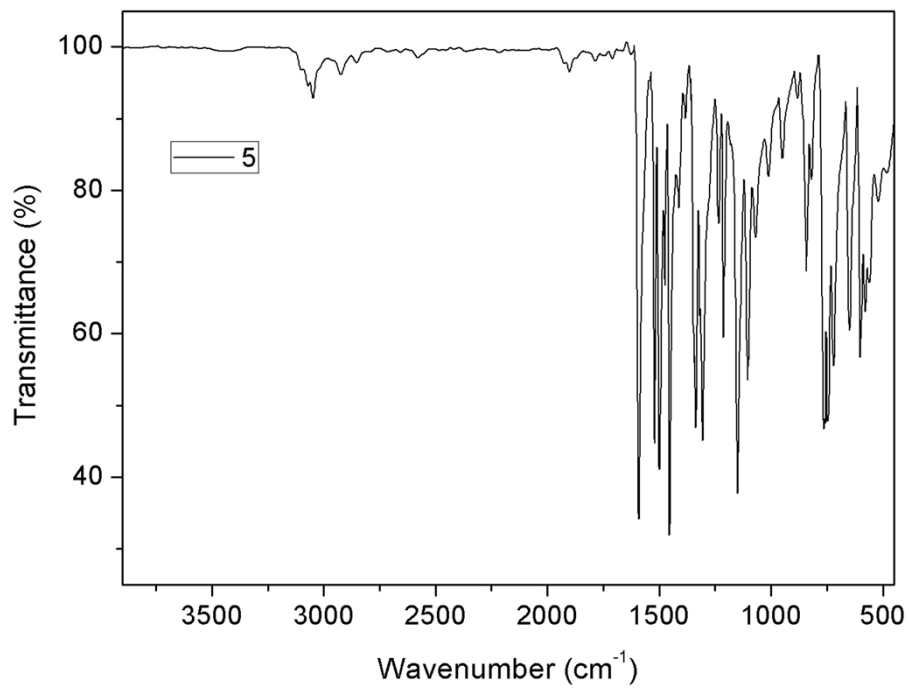

**Figure S5.** The IR spectrum of model compound **5**.

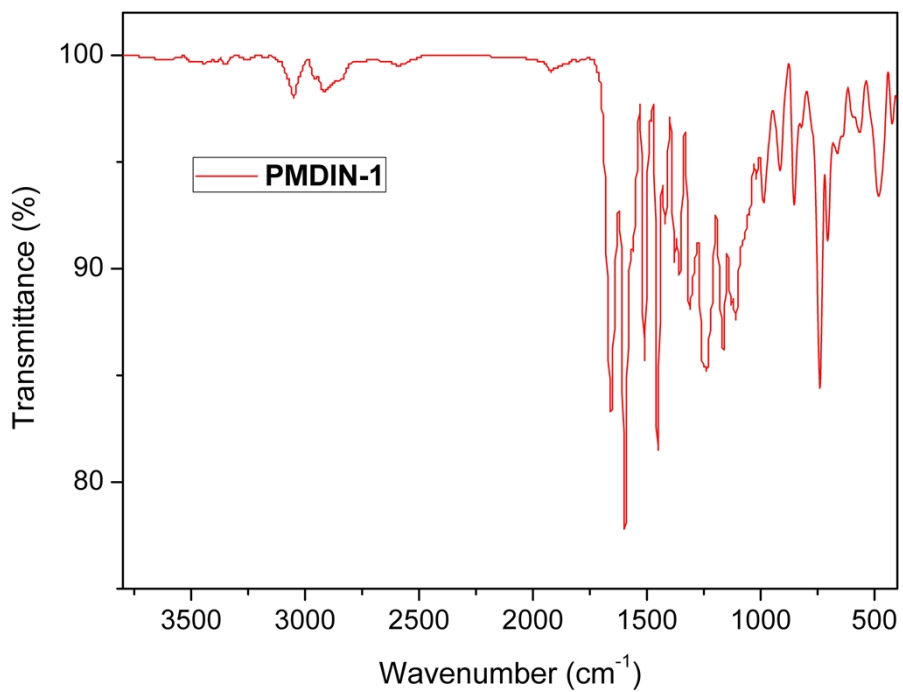

**Figure S6.** The IR spectrum of polymer **PMDIN-1**.

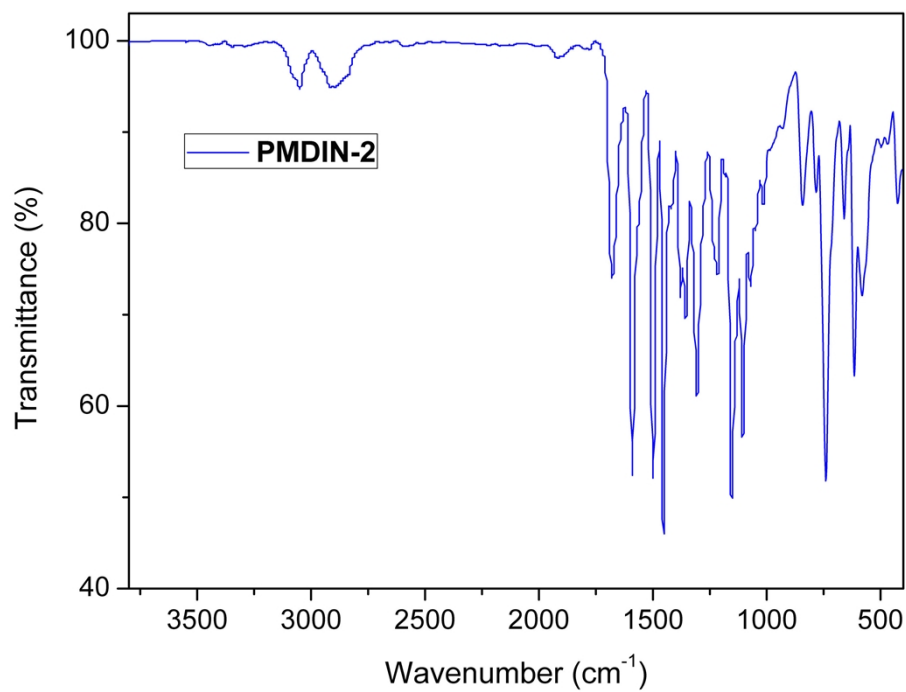

**Figure S7.** The IR spectrum of polymer **PMDIN-2**.

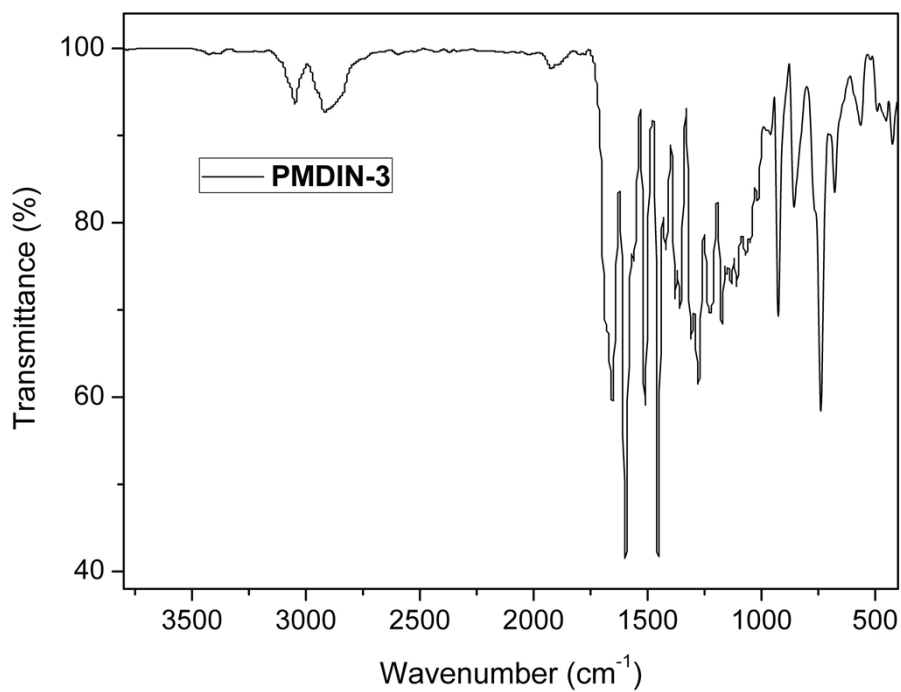

**Figure S8.** The IR spectrum of polymer **PMDIN-3**.

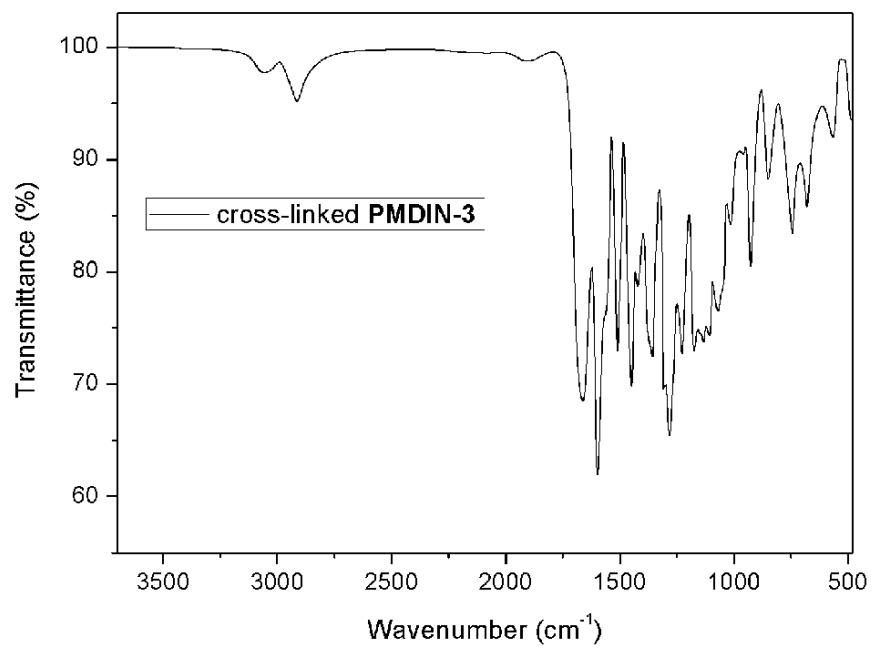

**Figure S9.** The IR spectrum of polymer cross-linked **PMDIN-3**.



#### IV. The SEM of the dip coated PMDIN-3 film

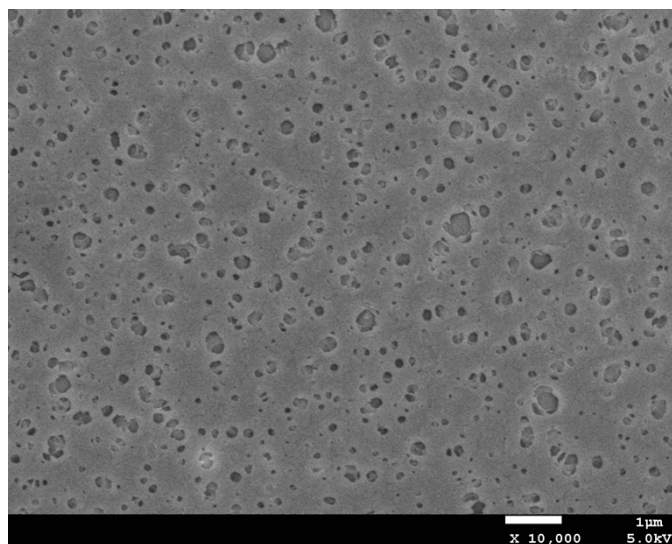

**Figure S10.** The SEM of the dip coated **PMDIN-3** film.

V. Copies of  $^1\text{H}$  and  $^{13}\text{C}$  NMR spectra of 3,3'-diindolylmethane, model compounds (3-5) and PMDINs

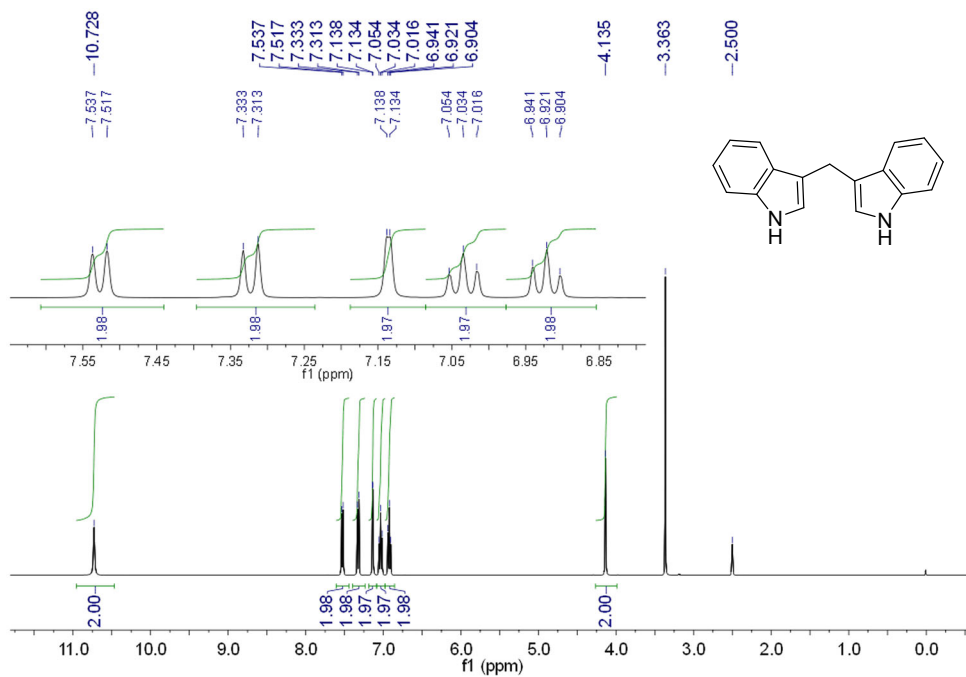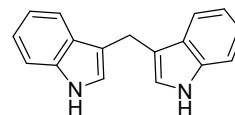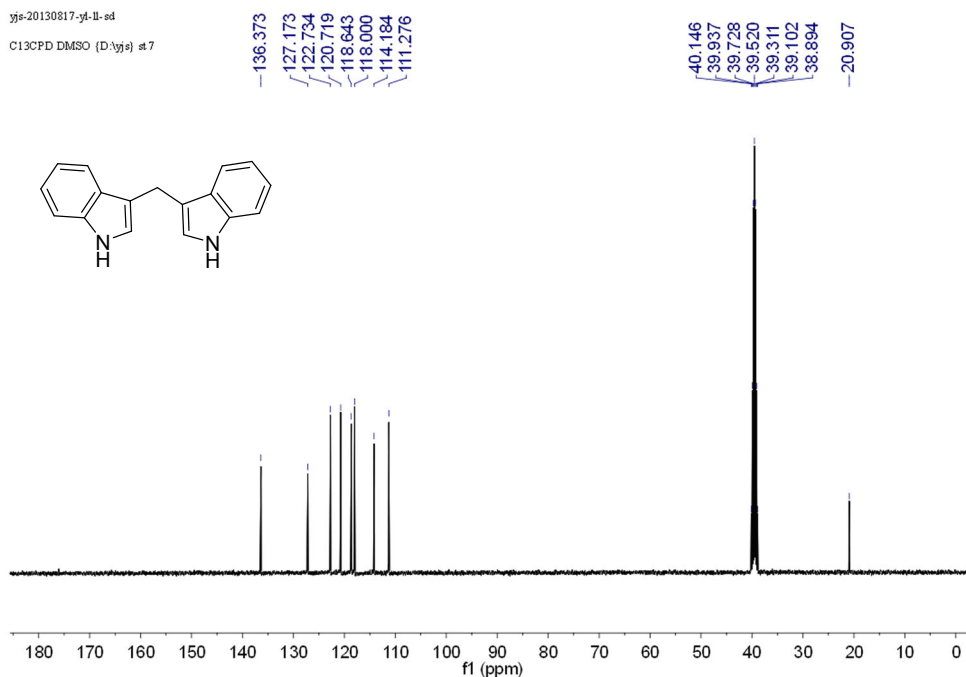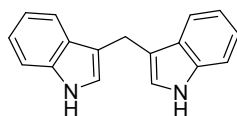

NMR Dai Yatang  
 1H-NMR  
 sample: #4  
 Name: Shang Cong  
 Temp=298.2K  
 Solvent=DMSO  
 2013-04-25

8.034  
 8.020  
 7.862  
 7.848  
 7.814  
 7.809  
 7.764  
 7.750  
 7.707  
 7.694  
 7.284  
 7.272  
 7.259  
 7.203  
 7.191  
 7.178  
 6.802  
 6.798

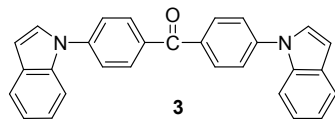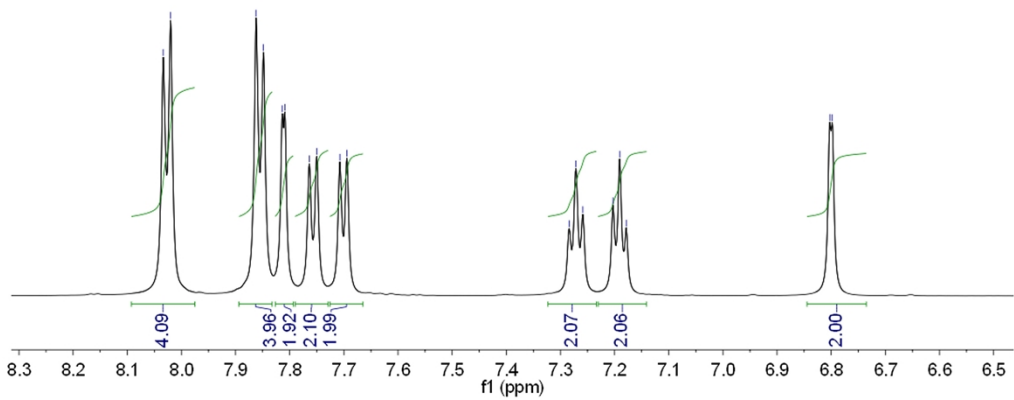

nmr  
 13C-NMR  
 sample: #4  
 Name: Li Zhengjiang  
 Temp=298.2K  
 Solvent=DMSO  
 2013-05-21

193.601  
 142.637  
 134.765  
 134.235  
 131.573  
 129.608  
 128.178  
 123.042  
 122.826  
 121.207  
 120.905  
 110.717  
 104.884  
 39.936  
 39.798  
 39.659  
 39.520  
 39.381  
 39.242  
 39.102

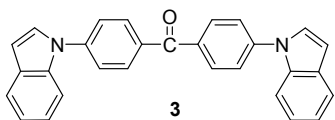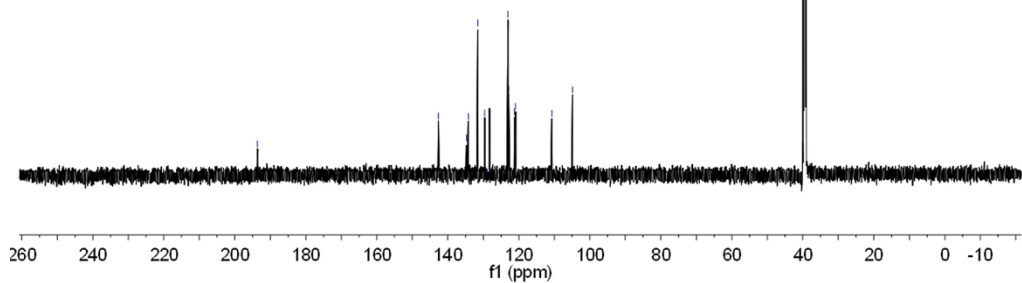

nmr  
1H NMR  
sample #6  
Name: Li Zhengjiang  
Temp: 298.2K  
Solvent: DMSO  
2013-05-21

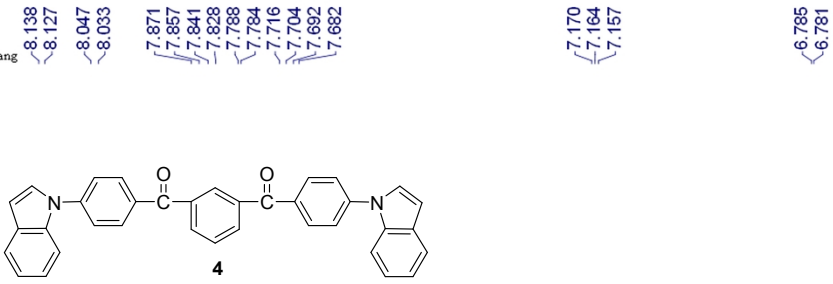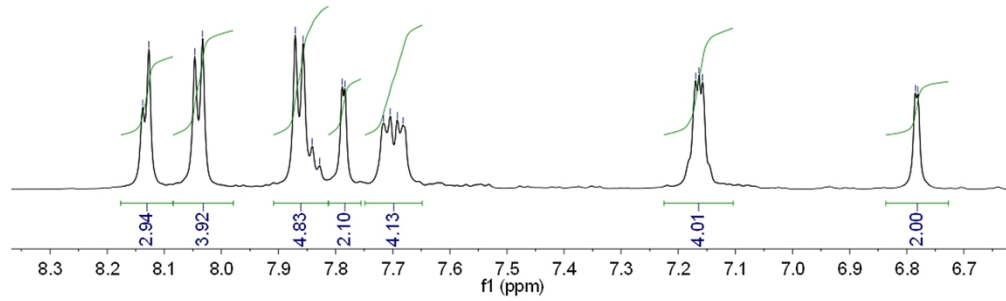

nmr  
13C-NMR  
sample #6  
Name: Li Zhengjiang  
Temp: 298.2K  
Solvent: DMSO  
2013-05-21

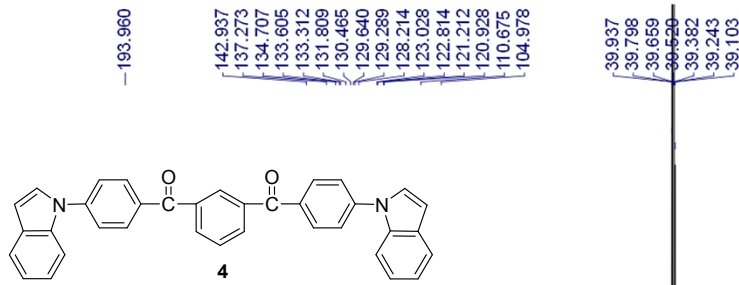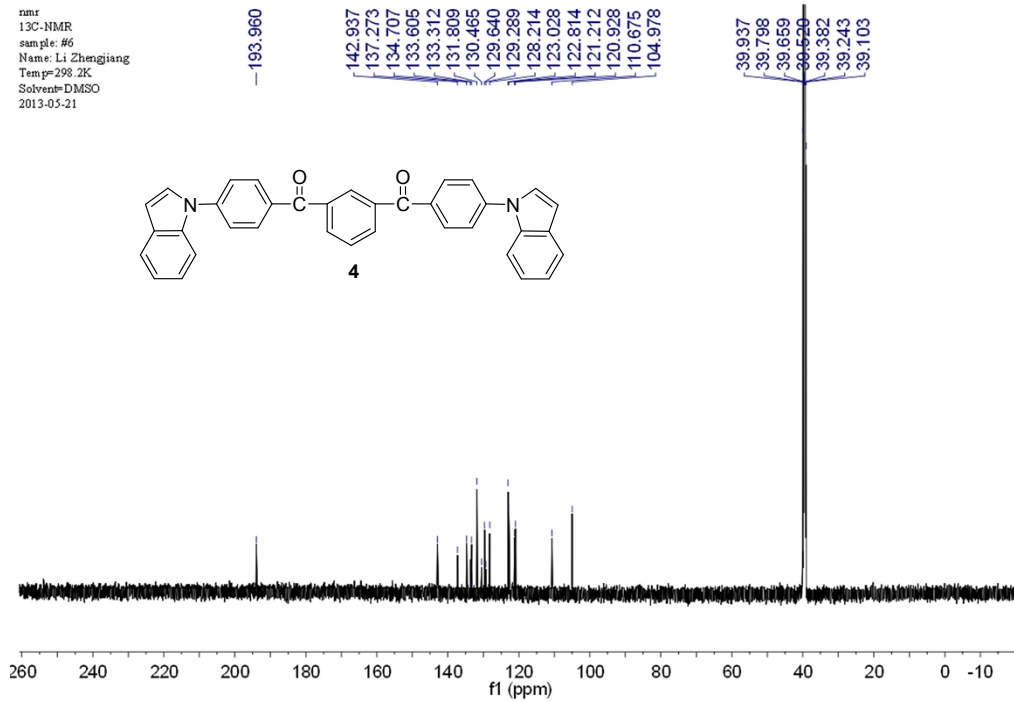

NMR Dai Yatang  
 1H NMR  
 sample: #5  
 Name: Shang Cong  
 Temp: 298.2K  
 Solvent: DMSO  
 2013-04-25

8.205  
8.191  
7.913  
7.899  
7.773  
7.768  
7.713  
7.700  
7.680  
7.667  
7.252  
7.240  
7.227  
7.188  
7.176  
7.164  
6.780  
6.775

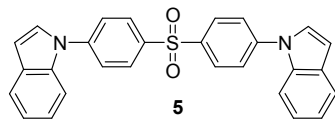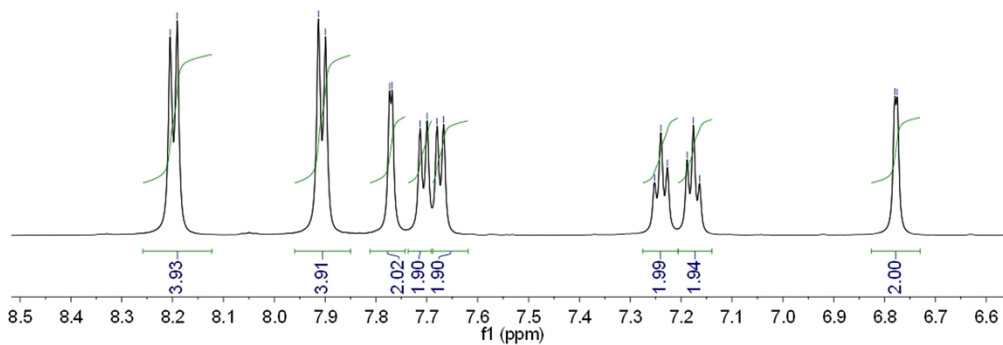

nmr  
 13C-NMR  
 sample: #5  
 Name: Li Zhengjiang  
 Temp: 298.2K  
 Solvent: DMSO  
 2013-05-21

143.341  
137.789  
134.610  
129.681  
129.389  
128.242  
124.004  
122.952  
121.220  
121.107  
110.682  
105.288

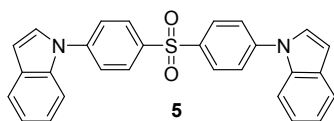

39.937  
39.798  
39.659  
39.520  
39.381  
39.242  
39.103

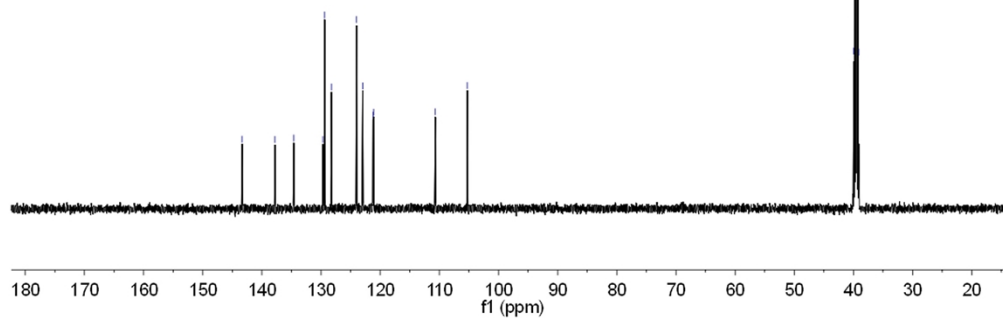

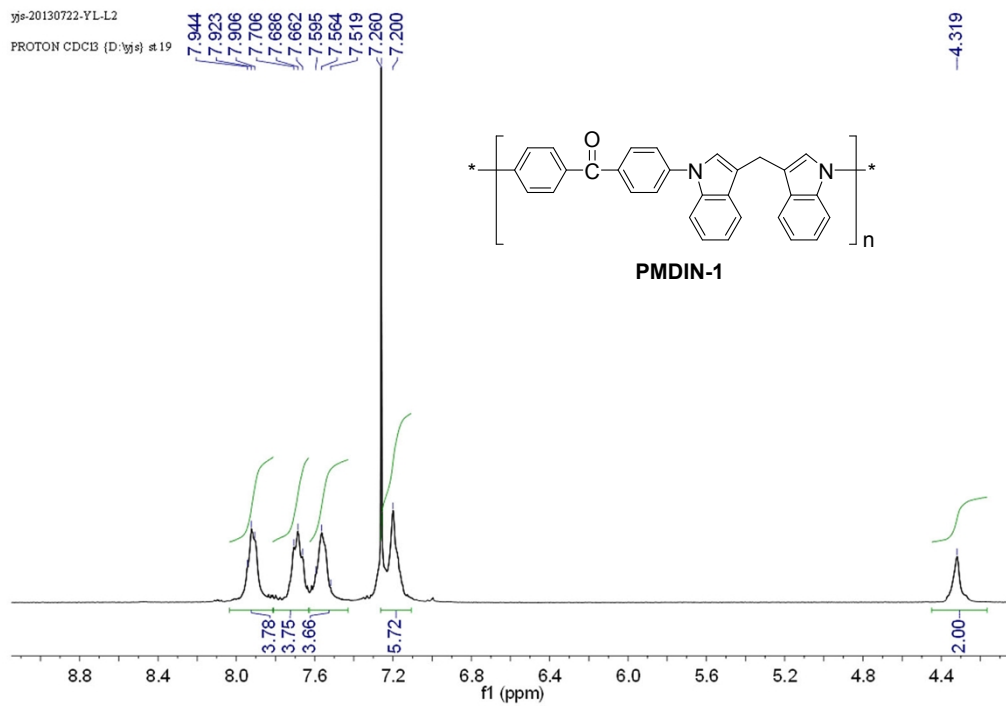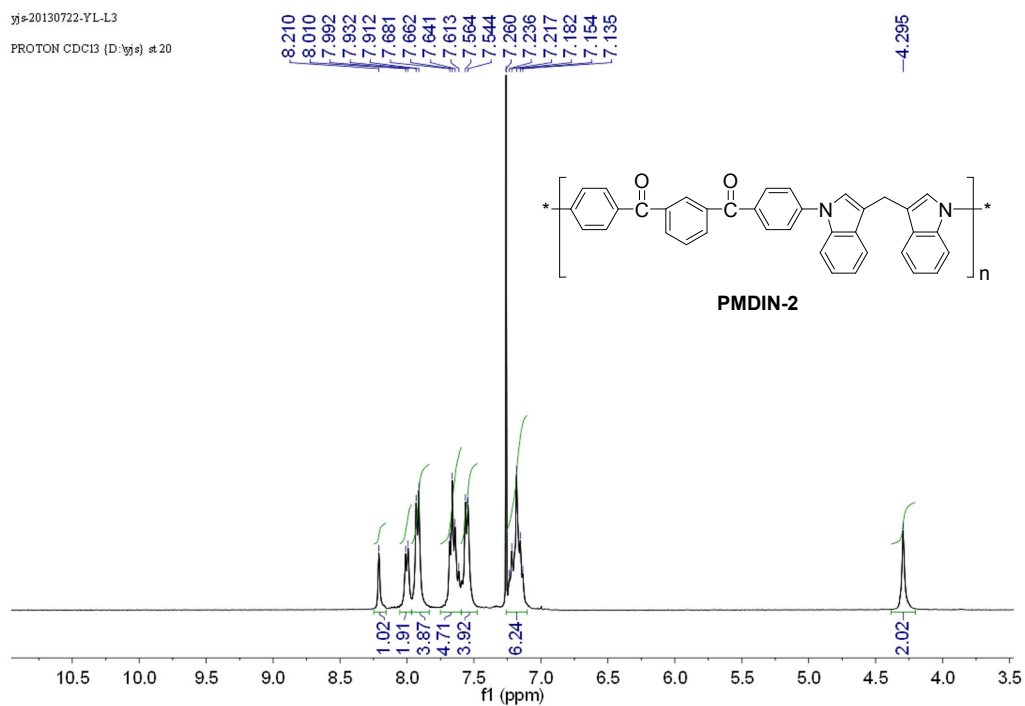

Supplement: c4ra03602f1.pdf [file c4ra03602f1.pdf]
